# Supplementary material for: Risk scores and coronary artery disease in patients with suspected acute coronary syndrome and intermediate cardiac troponin concentrations
Source: PubMed Central journal article supplement (PMC11298728; doi:10.1136/openhrt-2024-002755), 2024-08-01
Supplement: openhrt-11-2-s001.pdf [file openhrt-11-2-s001.pdf]

SUPPLEMENTAL MATERIAL

**Risk scores and coronary artery disease in patients with suspected  
acute coronary syndrome and intermediate  
cardiac troponin concentrations**

Daniel Perez-Vicencio, MSc,<sup>1,2\*</sup> Alexander JF Thurston, BMBCh,<sup>3\*</sup>  
Dimitrios Doudesis, PhD,<sup>1,2</sup> Rachel O'Brien, BN,<sup>4</sup> Amy V. Ferry, PhD,<sup>1</sup>  
Takeshi Fujisawa, PhD,<sup>1</sup> Michelle C. Williams, MBChB,<sup>1,5</sup> Alasdair J. Gray, MD,<sup>2,4</sup> Nicholas L  
Mills, MD,<sup>1,2</sup> Kuan Ken Lee, MD<sup>1,3</sup>

<sup>1</sup> BHF/University Centre for Cardiovascular Science, University of Edinburgh, Edinburgh, UK

<sup>2</sup> Usher Institute, University of Edinburgh, Edinburgh, UK

<sup>3</sup> Edinburgh Heart Centre, Royal Infirmary of Edinburgh, Edinburgh, UK

<sup>4</sup> Department of Emergency Medicine, Emergency Medicine Research Group, Royal Infirmary of Edinburgh, Edinburgh, UK

<sup>5</sup> Edinburgh Imaging Facility, University of Edinburgh, Edinburgh, UK

\*Contributed equally

**Corresponding Author:**

Dr Kuan Ken Lee

BHF/University Centre for Cardiovascular Science

The University of Edinburgh

Edinburgh EH16 4SA

United Kingdom

Telephone: 0044 131 242 6515

E-mail: [ken.lee@ed.ac.uk](mailto:ken.lee@ed.ac.uk)

**Supplemental Texts: 1**

**Supplemental Tables: 6**

**Supplemental Figures: 4**

## Supplemental Text 1. Risk scores calculation

To our knowledge, each risk score was calculated using the most recent version reported in the literature [1-7]. An R function was created for each risk score to allow for row wise calculation of risk scores in all patients. The R package “RiskScorescvd” was developed for the reproducibility of this analysis using any adequate dataset (<https://github.com/dvicencio/RiskScorescvd>)[8]. After calculating each patient's risk score, risk classification was assigned based on the corresponding thresholds. According to the ACC guidelines 2023, a HEART score of  $\leq 3$  or EDACS  $< 16$  discharge without further testing is reasonable, provided access to rapid follow-up is available [9]. We therefore stratified the classifications to binary, either "lowest risk" (HEART  $\leq 3$ , EDACS  $< 16$  [further steps are recommended for EDACS, **Table A**], GRACE  $\leq 88$ , ASCVD  $< .05$  or 5%, SCORE2  $< 5\%$ , SCORE2-OP  $< 7.5\%$  [**Table B**]) or "above lowest risk". An exploration of the data was performed to ensure all variables required to calculate the risk scores were available or could be derived (**Figure 1 and Supplemental Figure 2**). When derivation was required, insight from two clinicians was given. Missing data values were imputed using MICE R package following the protocol suggested by Jakobsen et. al [10] (**Figure 2B**).

**Table A.** EDACS additional considerations to categorise patients.

| <b>Low risk cohort:</b>               | <b>Not low risk cohort:</b>     |
|---------------------------------------|---------------------------------|
| EDACS <16 and                         | EDACS $\geq$ 16 or              |
| ECG shows no new ischaemia and        | ECG shows new ischaemia or      |
| 0-hr and 2-hr troponin both negative. | 0-hr or 2-hr troponin positive. |

**Table B.** SCORE2/OP additional considerations to categorise patients in the UK based on age.

|                                   | <b>Low risk</b> | <b>Moderate Risk</b> | <b>High risk</b> |
|-----------------------------------|-----------------|----------------------|------------------|
| <b>&lt; 50 years</b>              | <2.5%           | 2.5 to <7.5%         | $\geq$ 7.5%      |
| <b>50 – 69 years</b>              | <5%             | 5 to <10%            | $\geq$ 10%       |
| <b><math>\geq</math> 70 years</b> | <7.5%           | 7.5 to <15%          | $\geq$ 15%       |

**Supplemental Table 1.** Baseline characteristics patients without known previous coronary artery disease stratified by findings on coronary computed tomography angiography.

| <b>Variable</b>                      | <b>All participants,<br/>(n = 103)</b> | <b>No coronary artery disease,<br/>(n = 42)</b> | <b>Any coronary artery disease,<br/>(n = 61)</b> | <b>p-value<sup>1</sup></b> |
|--------------------------------------|----------------------------------------|-------------------------------------------------|--------------------------------------------------|----------------------------|
| <b>Female</b>                        | <b>35 (34%)</b>                        | <b>17 (40%)</b>                                 | <b>18 (30%)</b>                                  | <b>0.25</b>                |
| <b>Age</b>                           | <b>61 (13)</b>                         | <b>55 (12)</b>                                  | <b>65 (11)</b>                                   | <b>&lt;0.001</b>           |
| <b>Presenting symptom</b>            |                                        |                                                 |                                                  |                            |
| Chest Pain                           | 84 (82%)                               | 32 (76%)                                        | 52 (85%)                                         | 0.24                       |
| Anginal symptoms                     | 42 (41%)                               | 19 (45%)                                        | 23 (38%)                                         | 0.44                       |
| <b>Cardiovascular risk factor</b>    |                                        |                                                 |                                                  |                            |
| BMI kg/m2                            | 29.5 (5.9)                             | 29.9 (4.9)                                      | 29.2 (6.5)                                       | 0.33                       |
| Current or previous cigarette smoker | 52 (50%)                               | 16 (38%)                                        | 36 (59%)                                         | 0.037                      |
| Hypertension                         | 41 (40%)                               | 10 (24%)                                        | 31 (51%)                                         | 0.006                      |
| Diabetes                             | 12 (12%)                               | 3 (7.1%)                                        | 9 (15%)                                          | 0.35                       |
| Hyperlipidemia                       | 27 (26%)                               | 10 (24%)                                        | 17 (28%)                                         | 0.70                       |
| Family history                       | 33 (32%)                               | 16 (38%)                                        | 17 (28%)                                         | 0.27                       |
| Chronic kidney disease               | 7 (6.8%)                               | 2 (4.8%)                                        | 5 (8.2%)                                         | 0.70                       |
| <b>Medical history</b>               |                                        |                                                 |                                                  |                            |
| Angina                               | 0 (0%)                                 | 0 (0%)                                          | 0 (0%)                                           |                            |
| Myocardial infarction                | 0 (0%)                                 | 0 (0%)                                          | 0 (0%)                                           |                            |
| Stroke                               | 5 (4.9%)                               | 2 (4.8%)                                        | 3 (4.9%)                                         | >0.99                      |
| Peripheral vascular disease          | 1 (1.0%)                               | 0 (0%)                                          | 1 (1.6%)                                         | >0.99                      |
| <b>Physiology and investigations</b> |                                        |                                                 |                                                  |                            |
| Myocardial ischemia on ECG           | 6 (5.8%)                               | 1 (2.4%)                                        | 5 (8.2%)                                         | 0.40                       |
| T-wave inversion                     | 11 (11%)                               | 3 (7.5%)                                        | 8 (13%)                                          | 0.52                       |
| Heart rate, bmp                      | 80 (18)                                | 78 (20)                                         | 81 (16)                                          | 0.36                       |
| Systolic BP, mm Hg                   | 153 (26)                               | 153 (21)                                        | 152 (29)                                         | 0.42                       |
| Hemoglobin, g/L                      | 143 (14)                               | 143 (16)                                        | 143 (12)                                         | 0.73                       |
| Creatine                             | 78 (16)                                | 80 (19)                                         | 77 (14)                                          | 0.63                       |
| eGFR, mL/min/1.73 m2                 | 85 (17)                                | 87 (19)                                         | 84 (16)                                          | 0.43                       |
| Total cholesterol, mmol/L            | 5.17 (1.13)                            | 5.29 (0.89)                                     | 5.09 (1.27)                                      | 0.30                       |
| LDL cholesterol, mmol/L              | 3.25 (1.05)                            | 3.41 (0.90)                                     | 3.14 (1.13)                                      | 0.27                       |
| Peak troponin I concentration, ng/L  | 8 (6, 12)                              | 8 (7, 13)                                       | 8 (6, 11)                                        | 0.63                       |
| <b>Clinical risk scores</b>          |                                        |                                                 |                                                  |                            |
| HEART                                | 4 (3, 4)                               | 3 (2, 4)                                        | 4 (3, 5)                                         | 0.001                      |
| EDACS                                | 14 (12, 20)                            | 13 (9, 17)                                      | 17 (12, 21)                                      | 0.011                      |
| GRACE                                | 72 (56, 89)                            | 57 (44, 72)                                     | 85 (67, 100)                                     | <0.001                     |

**Supplemental Table 1.** Baseline characteristics patients without known previous coronary artery disease stratified by findings on coronary computed tomography angiography.

| <b>Variable</b> | <b>All participants,<br/>(n = 103)</b> | <b>No coronary artery disease,<br/>(n = 42)</b> | <b>Any coronary artery disease,<br/>(n = 61)</b> | <b>p-value<sup>1</sup></b> |
|-----------------|----------------------------------------|-------------------------------------------------|--------------------------------------------------|----------------------------|
| TIMI            | 1 (0, 1)                               | 0 (0, 1)                                        | 1 (0, 1)                                         | <0.001                     |
| PCE             | 0.15<br>(0.07, 0.32)                   | 0.08<br>(0.04, 0.16)                            | 0.22<br>(0.11, 0.34)                             | <0.001                     |
| SCORE2/OP       | 8 (5, 13)                              | 5 (4, 9)                                        | 12 (6, 17)                                       | <0.001                     |

Values are median (interquartile range), n (%) or mean  $\pm$  SD. <sup>1</sup> Pearson's Chi-squared test; Wilcoxon rank sum test; Fisher's exact test. BMI = body mass index; BP = blood pressure; bmp = beats per minute; CABG = coronary artery bypass grafting; CAD = coronary artery disease; ECG = electrocardiogram; EDACS = Emergency Department Assessment of Chest Pain Score; eGFR = estimated glomerular filtration rate; GRACE 2.0 = Global Registry of Acute Coronary Events version 2.0; HEART = History, ECG, Age, Risk factors, Troponin; LDL = low-density lipoprotein; PCE = pooled cohort equations; PCI = percutaneous coronary intervention; SCORE2/OP = Systematic COronary Risk Evaluation 2/Older Population; TIMI = Thrombolysis In Myocardial Infarction.

**Supplemental Table 2.** Baseline characteristics of patients stratified by the presence or absence of obstructive coronary artery disease.

| Variable                             | All participants,<br>(n = 167) | No coronary artery<br>disease,<br>(n = 47) | Non-<br>obstructive<br>coronary<br>artery<br>disease,<br>(n = 70) | Obstructive<br>coronary artery<br>disease,<br>(n = 50) | p-value <sup>1</sup> |
|--------------------------------------|--------------------------------|--------------------------------------------|-------------------------------------------------------------------|--------------------------------------------------------|----------------------|
| <b>Female</b>                        | 46 (28%)                       | 19 (40%)                                   | 18 (26%)                                                          | 9 (18%)                                                | 0.044                |
| <b>Age</b>                           | 64 (12)                        | 56 (13)                                    | 65 (11)                                                           | 70 (10)                                                | <0.001               |
| <b>Presenting symptom</b>            |                                |                                            |                                                                   |                                                        |                      |
| Chest Pain                           | 143 (86%)                      | 37 (79%)                                   | 60 (86%)                                                          | 46 (92%)                                               | 0.19                 |
| Anginal symptoms                     | 76 (46%)                       | 21 (45%)                                   | 32 (46%)                                                          | 23 (46%)                                               | >0.99                |
| <b>Cardiovascular risk factor</b>    |                                |                                            |                                                                   |                                                        |                      |
| BMI kg/m <sup>2</sup>                | 29.3 (5.8)                     | 29.6 (5.2)                                 | 29.7 (6.3)                                                        | 28.5 (5.6)                                             | 0.51                 |
| Current or previous cigarette smoker | 89 (53%)                       | 18 (38%)                                   | 38 (54%)                                                          | 33 (66%)                                               | 0.026                |
| Hypertension                         | 79 (47%)                       | 11 (23%)                                   | 39 (56%)                                                          | 29 (58%)                                               | <0.001               |
| Diabetes                             | 30 (18%)                       | 3 (6.4%)                                   | 14 (20%)                                                          | 13 (26%)                                               | 0.027                |
| Hyperlipidaemia                      | 33 (20%)                       | 10 (22%)                                   | 17 (24%)                                                          | 6 (12%)                                                | 0.22                 |
| Family history                       | 64 (38%)                       | 17 (36%)                                   | 29 (41%)                                                          | 18 (36%)                                               | 0.83                 |
| Chronic kidney disease               | 19 (11%)                       | 2 (4.3%)                                   | 8 (11%)                                                           | 9 (18%)                                                | 0.10                 |
| <b>Medical history</b>               |                                |                                            |                                                                   |                                                        |                      |
| Angina                               | 34 (20%)                       | 2 (4.3%)                                   | 14 (20%)                                                          | 18 (36%)                                               | <0.001               |
| Myocardial infarction                | 40 (24%)                       | 3 (6.4%)                                   | 16 (23%)                                                          | 21 (42%)                                               | <0.001               |
| Stroke/TIA                           | 13 (7.8%)                      | 2 (4.3%)                                   | 6 (8.6%)                                                          | 5 (10%)                                                | 0.58                 |
| Peripheral vascular disease          | 6 (3.6%)                       | 0 (0%)                                     | 1 (1.4%)                                                          | 5 (10%)                                                | 0.021                |
| <b>Previous revascularization</b>    |                                |                                            |                                                                   |                                                        |                      |
| PCI                                  | 40 (24%)                       | 3 (6.4%)                                   | 15 (21%)                                                          | 22 (44%)                                               | <0.001               |
| CABG                                 | 10 (6.0%)                      | 0 (0%)                                     | 7 (10%)                                                           | 3 (6.0%)                                               | 0.071                |
| <b>Physiology and investigations</b> |                                |                                            |                                                                   |                                                        |                      |
| Myocardial ischaemia on ECG          | 8 (4.8%)                       | 3 (6.4%)                                   | 4 (5.7%)                                                          | 1 (2.0%)                                               | 0.60                 |
| ST depression                        | 0 (0%)                         | 0 (0%)                                     | 0 (0%)                                                            | 0 (0%)                                                 |                      |
| T-wave inversion                     | 24 (15%)                       | 5 (11%)                                    | 8 (12%)                                                           | 11 (22%)                                               | 0.24                 |
| Heart rate, bmp                      | 76 (18)                        | 77 (20)                                    | 78 (17)                                                           | 73 (18)                                                | 0.49                 |
| Systolic BP, mm Hg                   | 151 (27)                       | 152 (22)                                   | 152 (31)                                                          | 150 (26)                                               | 0.95                 |
| Haemoglobin, g/L                     | 143 (15)                       | 143 (16)                                   | 144 (14)                                                          | 143 (14)                                               | 0.94                 |
| Creatine                             | 82 (19)                        | 79 (19)                                    | 81 (16)                                                           | 86 (21)                                                | 0.21                 |
| eGFR, mL/min/1.73 m <sup>2</sup>     | 82 (18)                        | 87 (18)                                    | 82 (17)                                                           | 77 (16)                                                | 0.018                |
| Total cholesterol, mmol/L            | 4.82 (1.18)                    | 5.18 (0.95)                                | 4.80 (1.27)                                                       | 4.50 (1.17)                                            | 0.016                |
| LDL cholesterol, mmol/L              | 2.96 (1.18)                    | 3.30 (0.94)                                | 2.97 (1.17)                                                       | 2.66 (1.32)                                            | 0.028                |

**Supplemental Table 2.** Baseline characteristics of patients stratified by the presence or absence of obstructive coronary artery disease.

| Variable                            | All participants,<br>(n = 167) | No coronary artery disease,<br>(n = 47) | Non-obstructive coronary artery disease,<br>(n = 70) | Obstructive coronary artery disease,<br>(n = 50) | p-value <sup>1</sup> |
|-------------------------------------|--------------------------------|-----------------------------------------|------------------------------------------------------|--------------------------------------------------|----------------------|
| Peak troponin I concentration, ng/L | 8 (6, 12)                      | 8 (7, 13)                               | 8 (6, 12)                                            | 8 (7, 12)                                        | 0.92                 |
| <b>Clinical risk scores</b>         |                                |                                         |                                                      |                                                  |                      |
| HEART                               | 4 (3, 5)                       | 3 (2, 4.50)                             | 4 (4, 5)                                             | 5 (4, 5)                                         | <0.001               |
| EDACS                               | 17 (12, 21)                    | 14 (10.8, 17)                           | 17 (12, 21)                                          | 18 (14, 24)                                      | 0.002                |
| GRACE                               | 78 (64, 96)                    | 62 (45, 73)                             | 84 (67, 98)                                          | 88 (77, 108)                                     | <0.001               |
| TIMI                                | 1 (0, 2)                       | 0 (0, 1)                                | 1 (1, 2)                                             | 2 (1, 3)                                         | <0.001               |
| PCE                                 | 0.19<br>(0.08, 0.36)           | 0.09<br>(0.04, 0.16)                    | 0.20<br>(0.11, 0.36)                                 | 0.32<br>(0.16, 0.45)                             | <0.001               |
| SCORE2/OP                           | 10.5<br>(5.0, 16.0)            | 5.0<br>(4.0, 9.0)                       | 11.5<br>(6.0, 17.0)                                  | 15.0<br>(8.5, 18.8)                              | <0.001               |

Values are median (interquartile range), n (%) or mean  $\pm$  SD. <sup>1</sup> One-way ANOVA; Wilcoxon rank sum test; Fisher's exact test. BMI = body mass index; BP = blood pressure; bmp = beats per minute; CABG = coronary artery bypass grafting; CAD = coronary artery disease; ECG = electrocardiogram; EDACS = Emergency Department Assessment of Chest Pain Score; eGFR = estimated glomerular filtration rate; GRACE 2.0 = Global Registry of Acute Coronary Events version 2.0; HEART = History, ECG, Age, Risk factors, Troponin; LDL = low-density lipoprotein; PCE = pooled cohort equations; PCI = percutaneous coronary intervention; SCORE2/OP = Systematic COronary Risk Evaluation 2/Older Population; TIMI = Thrombolysis In Myocardial Infarction.

**Supplemental Table 3.** Diagnostic performance of risk scores lowest thresholds for obstructive coronary artery disease

| <b>Risk Scores<br/>(Threshold)</b> | <b>True<br/>Positive</b> | <b>False<br/>Positive</b> | <b>True<br/>Negative</b> | <b>False<br/>Negative</b> | <b>Negative<br/>Predictive<br/>Value<br/>(95% CI)</b> | <b>Positive<br/>Predictive<br/>Value<br/>(95% CI)</b> | <b>Sensitivity<br/>(95% CI)</b> | <b>Specificity<br/>(95% CI)</b> | <b>Proportion<br/>Ruled Out</b> | <b>AUC</b>               |
|------------------------------------|--------------------------|---------------------------|--------------------------|---------------------------|-------------------------------------------------------|-------------------------------------------------------|---------------------------------|---------------------------------|---------------------------------|--------------------------|
| HEART (<4)                         | 47                       | 73                        | 44                       | 3                         | 93.6<br>(85.7 - 100)                                  | 39.4<br>(31.1 - 48.2)                                 | 94.0<br>(86.7 - 100)            | 37.7<br>(28.5 - 47.7)           | 28%                             | 0.695<br>(0.618 - 0.772) |
| EDACS (<16)*                       | 37                       | 66                        | 51                       | 13                        | 79.4<br>(68.4 - 89.1)                                 | 36.1<br>(27.5 - 45.3)                                 | 73.7<br>(61.0 - 85.7)           | 43.8<br>(34.5 - 52.6)           | 38%                             | 0.649<br>(0.555 - 0.743) |
| GRACE 2.0<br>(≤88)                 | 27                       | 38                        | 79                       | 23                        | 77.3<br>(69.1 - 85.1)                                 | 41.9<br>(30.4 - 54.2)                                 | 53.9<br>(39.5 - 67.5)           | 67.8<br>(59.5 - 76.1)           | 61%                             | 0.693<br>(0.608 - 0.778) |
| TIMI (=0)                          | 48                       | 76                        | 41                       | 2                         | 95.2<br>(87.2 - 100)                                  | 38.9<br>(30.6 - 47.5)                                 | 95.9<br>(90 - 100)              | 35.1<br>(26.3 - 44.6)           | 26%                             | 0.730<br>(0.653 - 0.808) |
| PCE (<5%)                          | 49                       | 100                       | 17                       | 1                         | 94.1<br>(81.2 - 100)                                  | 33.1<br>(26.1 - 40.4)                                 | 97.9<br>(93.5 - 100)            | 14.5<br>(8.5 - 21.6)            | 11%                             | 0.714<br>(0.631 - 0.797) |
| SCORE2/OP<br>(<5%)*                | 47                       | 97                        | 20                       | 3                         | 86.7<br>(71.4 - 100)                                  | 32.8<br>(25.2 - 40.6)                                 | 93.9<br>(86.8 - 100)            | 17.1<br>(10.7 - 24.8)           | 14%                             | 0.714<br>(0.631 - 0.796) |

Values are (Rule out threshold); ASCVD = Atherosclerosis Cardiovascular Disease; AUC = area under the curve; CI = confidence interval; EDACS = Emergency Department Assessment of Chest Pain Score; GRACE 2.0 = Global Registry of Acute Coronary Events version 2.0; HEART = History, ECG, Age, Risk factors, Troponin; SCORE2/OP = Systematic COronary Risk Evaluation 2/Older Population; TIMI = Thrombolysis In Myocardial Infarction. \*When EDACS and SCORE2/OP applied further criteria are recommended (Supplement Tables 1 and 2).



**Supplemental Table 4.** Diagnostic performance of risk scores lowest thresholds for any coronary artery disease

| <b>Risk Scores (Threshold)</b> | <b>True Positive</b> | <b>False Positive</b> | <b>True Negative</b> | <b>False Negative</b> | <b>Negative Predictive Value (95% CI)</b> | <b>Positive Predictive Value (95% CI)</b> | <b>Sensitivity (95% CI)</b> | <b>Specificity (95% CI)</b> | <b>Proportion Ruled Out</b> | <b>AUC</b>               |
|--------------------------------|----------------------|-----------------------|----------------------|-----------------------|-------------------------------------------|-------------------------------------------|-----------------------------|-----------------------------|-----------------------------|--------------------------|
| HEART (<4)                     | 100                  | 20                    | 27                   | 20                    | 57.3<br>(43.2 - 71.4)                     | 83.4<br>(77.1 - 89.8)                     | 83.3<br>(76.5 - 89.7)       | 57.5<br>(43.7 - 72.2)       | 28%                         | 0.742<br>(0.655 - 0.829) |
| EDACS (<16)*                   | 82                   | 21                    | 26                   | 38                    | 40.3<br>(27.3 - 52.8)                     | 79.7<br>(72.0 - 87.0)                     | 68.1<br>(59.8 - 76.2)       | 55.4<br>(39.5 - 69.1)       | 38%                         | 0.684<br>(0.597 - 0.772) |
| GRACE 2.0 (≤88)                | 55                   | 10                    | 37                   | 65                    | 36.2<br>(26.9 - 45.9)                     | 84.9<br>(75.5 - 93.0)                     | 45.7<br>(36.6 - 54.4)       | 79.1<br>(66.7 - 90.2)       | 61%                         | 0.714<br>(0.624 - 0.804) |
| TIMI (=0)                      | 104                  | 20                    | 27                   | 16                    | 62.4<br>(48.8 - 77.3)                     | 84.0<br>(77.7 - 90.4)                     | 86.6<br>(80.6 - 92.0)       | 57.5<br>(42.2 - 72.7)       | 26%                         | 0.784<br>(0.713 - 0.854) |
| PCE (<5%)                      | 114                  | 35                    | 12                   | 6                     | 66.4<br>(44.4 - 87.5)                     | 76.6<br>(69.5 - 83.3)                     | 94.9<br>(90.7 - 98.4)       | 25.6<br>(13.2 - 38.6)       | 11%                         | 0.754<br>(0.675 - 0.833) |
| SCORE2/OP (<5%)*               | 108                  | 36                    | 11                   | 12                    | 47.5<br>(26.3 - 68.2)                     | 75.1<br>(67.9 - 81.9)                     | 89.9<br>(84.1 - 95.1)       | 23.4<br>(11.1 - 36.2)       | 14%                         | 0.757<br>(0.680 - 0.834) |

Values are (Rule out threshold); ASCVD = Atherosclerosis Cardiovascular Disease; AUC = area under the curve; CI = confidence interval; EDACS = Emergency Department Assessment of Chest Pain Score; GRACE 2.0 = Global Registry of Acute Coronary Events version 2.0; HEART = History, ECG, Age, Risk factors, Troponin; SCORE2/OP = Systematic COronary Risk Evaluation 2/Older Population; TIMI = Thrombolysis In Myocardial Infarction. \*When EDACS and SCORE2/OP applied further criteria are recommended (Supplement Tables 1 and 2).

**Supplemental Table 5.** Diagnostic performance of risk scores lowest thresholds for any coronary artery disease in intermediate-risk patients without known previous coronary artery disease

| <b>Risk Scores (Threshold)</b> | <b>True Positive</b> | <b>False Positive</b> | <b>True Negative</b> | <b>False Negative</b> | <b>Negative Predictive Value (95% CI)</b> | <b>Positive Predictive Value (95% CI)</b> | <b>Sensitivity (95% CI)</b> | <b>Specificity (95% CI)</b> | <b>Proportion Ruled Out</b> | <b>AUC</b>               |
|--------------------------------|----------------------|-----------------------|----------------------|-----------------------|-------------------------------------------|-------------------------------------------|-----------------------------|-----------------------------|-----------------------------|--------------------------|
| HEART (<4)                     | 41                   | 15                    | 27                   | 20                    | 57.2<br>(43.1 - 70.7)                     | 73.0<br>(61.1 - 83.6)                     | 67.0<br>(55.4 - 77.8)       | 64.1<br>(50.0 - 78.4)       | 46%                         | 0.701<br>(0.599 - 0.803) |
| EDACS (<16)*                   | 38                   | 17                    | 25                   | 23                    | 51.9<br>(37.8 - 66.0)                     | 68.9<br>(56.6 - 80.8)                     | 62.3<br>(50.8 - 73.8)       | 59.0<br>(44.4 - 73.3)       | 47%                         | 0.658<br>(0.551 - 0.764) |
| GRACE 2.0 (≤88)                | 25                   | 6                     | 36                   | 36                    | 50.0<br>(38.0 - 61.1)                     | 80.7<br>(65.4 - 93.3)                     | 41.1<br>(28.8 - 53.3)       | 85.7<br>(73.5 - 95.5)       | 70%                         | 0.712<br>(0.611 - 0.814) |
| TIMI (=0)                      | 45                   | 15                    | 27                   | 16                    | 62.7<br>(47.8 - 76.6)                     | 75.0<br>(63.6 - 85.5)                     | 73.6<br>(62.5 - 84.7)       | 64.3<br>(50.0 - 79.0)       | 42%                         | 0.708<br>(0.615 - 0.801) |
| PCE (<5%)                      | 58                   | 31                    | 11                   | 3                     | 79.2<br>(55.5 - 100.0)                    | 65.1<br>(55.5 - 74.7)                     | 95.3<br>(89.3 - 100)        | 25.9<br>(13.3 - 40.0)       | 14%                         | 0.742<br>(0.645 - 0.838) |
| SCORE2/OP (<5%)*               | 55                   | 32                    | 10                   | 6                     | 62.6<br>(38.1 - 85.7)                     | 63.3<br>(53.3 - 73.2)                     | 90.2<br>(82.4 - 96.8)       | 23.9<br>(11.4 - 37.5)       | 16%                         | 0.753<br>(0.659 - 0.846) |

Values are (Rule out threshold); ASCVD = Atherosclerosis Cardiovascular Disease; AUC = area under the curve; CI = confidence interval; EDACS = Emergency Department Assessment of Chest Pain Score; GRACE 2.0 = Global Registry of Acute Coronary Events version 2.0; HEART = History, ECG, Age, Risk factors, Troponin; SCORE2/OP = Systematic COronary Risk Evaluation 2/Older Population; TIMI = Thrombolysis In Myocardial Infarction. \*When EDACS and SCORE2/OP applied further criteria are recommended (Supplement Tables 1 and 2).

**Supplemental Table 6.** Diagnostic performance of risk scores lowest thresholds for obstructive coronary artery disease in intermediate-risk patients without known previous coronary artery disease

| <b>Risk Scores (threshold)</b> | <b>True Positive</b> | <b>False Positive</b> | <b>True Negative</b> | <b>False Negative</b> | <b>Negative Predictive Value (95% CI)</b> | <b>Positive Predictive Value (95% CI)</b> | <b>Sensitivity (95% CI)</b> | <b>Specificity (95% CI)</b> | <b>Proportion Ruled Out</b> | <b>AUC</b>               |
|--------------------------------|----------------------|-----------------------|----------------------|-----------------------|-------------------------------------------|-------------------------------------------|-----------------------------|-----------------------------|-----------------------------|--------------------------|
| HEART (<4)                     | 15                   | 41                    | 44                   | 3                     | 93.6<br>(85.7 - 100.0)                    | 26.7<br>(15.7 - 39.3)                     | 83.1<br>(62.5 - 100)        | 51.8<br>(41.7 - 62.7)       | 46%                         | 0.647<br>(0.543 - 0.752) |
| EDACS (<16)*                   | 12                   | 43                    | 42                   | 6                     | 87.5<br>(78.0 - 95.8)                     | 21.7<br>(11.3 - 33.3)                     | 66.6<br>(42.8 - 88.0)       | 49.2<br>(38.8 - 59.6)       | 47%                         | 0.641<br>(0.488 - 0.795) |
| GRACE 2.0 (≤88)                | 9                    | 22                    | 63                   | 9                     | 87.5<br>(79.4 - 94.3)                     | 29.0<br>(13.3 - 46.0)                     | 49.9<br>(26.3 - 73.3)       | 74.0<br>(63.5 - 82.8)       | 70%                         | 0.727<br>(0.604 - 0.851) |
| TIMI (=0)                      | 16                   | 44                    | 41                   | 2                     | 95.5<br>(88.6 - 100.0)                    | 26.8<br>(16.1 - 37.9)                     | 89.2<br>(72.7 - 100.0)      | 48.4<br>(37.6 - 59.3)       | 42%                         | 0.671<br>(0.565 - 0.778) |
| PCE (<5%)                      | 18                   | 71                    | 14                   | 0                     | 100.0<br>(100.0 - 100.0)                  | 20.1<br>(12.2 - 28.6)                     | 100.0<br>(100 - 100)        | 16.2<br>(8.5 - 24.4)        | 14%                         | 0.747<br>(0.639 - 0.856) |
| SCORE2/OP (<5%)*               | 18                   | 69                    | 16                   | 0                     | 100.0<br>(100.0 - 100.0)                  | 20.7<br>(12.5 - 29.5)                     | 100.0<br>(100 - 100)        | 18.9<br>(11.1 - 27.7)       | 16%                         | 0.746<br>(0.639 - 0.853) |

Values are (Rule out threshold); ASCVD = Atherosclerosis Cardiovascular Disease; AUC = area under the curve; CI = confidence interval; EDACS = Emergency Department Assessment of Chest Pain Score; GRACE 2.0 = Global Registry of Acute Coronary Events version 2.0; HEART = History, ECG, Age, Risk factors, Troponin; SCORE2/OP = Systematic COronary Risk Evaluation 2/Older Population; TIMI = Thrombolysis In Myocardial Infarction. \*When EDACS and SCORE2/OP applied further criteria are recommended (Supplement Tables 1 and 2).

**Supplemental Figure 1. Summary of commonly used clinical risk scores and their calculations.** \*ARCHITECT/STAT troponin I assay; Abbott Laboratories. † The risk factors only apply to patients 18 – 50. \*\*Undergoes equation transformation based on age. C represents a constant; BP blood pressure; yo years old; TnI Troponin I; chol cholesterol; HDL High Density Lipoprotein; ECG Electrocardiogram; HEART, History, ECG, Age, Risk factors, Troponin; EDACS, Emergency Department Assessment of Chest Pain Score; TIMI Thrombolysis In Myocardial Infarction; GRACE 2.0 Global Registry of Acute Coronary Events version 2.0; ASCVD Atherosclerosis Cardiovascular Disease; SCORE2/OP Systematic COronary Risk Evaluation 2/Older Population.

|                                                                                                              | <b>HEART</b>                                                                           | <b>EDACS</b>                                                                          | <b>TIMI</b>                                                           | <b>GRACE 2.0</b>                                               | <b>PCE</b>                                                                                                                            | <b>SCORE2/OP</b>                                                                |
|--------------------------------------------------------------------------------------------------------------|----------------------------------------------------------------------------------------|---------------------------------------------------------------------------------------|-----------------------------------------------------------------------|----------------------------------------------------------------|---------------------------------------------------------------------------------------------------------------------------------------|---------------------------------------------------------------------------------|
|  <b>Troponin*/biomarker</b> | TnI<br>≤ normal limit: 0<br>1 - 3x normal limit: 1<br>>3x normal limit: 2              | TnI 0hr or 2hr > 99th %:<br>High Risk                                                 | TnI > 99th %: 1                                                       | TnI > 99th %: 13<br>Creatine x C: 0–28                         | Log(Total chol) x C <sup>Tc</sup><br>Log(HDL) x C <sup>H</sup>                                                                        | Total chol x C <sup>Tc**</sup><br>HDL x C <sup>H**</sup>                        |
|  <b>Risk/History</b>        | No typical features: 0<br>Mixed typical/non - typical: 1<br>Mostly typical features: 2 | †Coronary disease or risk factors ≥3: 4<br>Diaphoresis: 3                             | Risk factors ≥3: 1<br>Aspirin use: 1<br>Known CAD (stenosis ≥50 %): 1 | Killip class: 0–44<br>Cardiac arrest: 30                       | Diabetes: 1 x C <sup>d</sup><br>Smoker: 1 x C <sup>s</sup><br>Coefficients (C <sup>x</sup> ) change depending on Race: Black or White | Diabetes: 1 x C <sup>d</sup><br>Smoker: 1 x C <sup>s</sup>                      |
|  <b>Age</b>                 | < 45 yo: 0<br>45 to 64 yo: 1<br>≥65 yo: 2                                              | 18 to 45 yo: 2<br>46 to 85 yo: 4–18<br>≥86 yo: 20                                     | <65 yo: 0<br>65 to 74 yo: 2<br>≥75 yo: 3                              | <90 yo x C: 0–98<br>≥90 yo: 100                                | Log(Age) x C <sup>a</sup><br>Log(Age) x Log(all) <sup>§</sup>                                                                         | Coefficients (C <sup>x</sup> ) change depending of Age: <70 or ≥70              |
|  <b>Sex</b>                | -                                                                                      | Female: 0<br>Male: 6                                                                  | -                                                                     | -                                                              | Coefficients (C <sup>x</sup> ) change depending on sex: Female or Male                                                                | Coefficients (C <sup>x</sup> ) change depending of sex: Female or Male          |
|  <b>Physiology</b>        | Normal ECG: 0<br>Abnormal ECG: 1<br>ST depression: 2                                   | Typical pain radiation: 5<br>Worse pain on inspiration: - 4<br>Pain by palpation: - 6 | Severe angina: 1<br>ECG ST Elevation or LBBB: 1                       | Heart rate x C: 0–34<br>Systolic BP x C: 0–40<br>ST change: 17 | Log(Systolic BP) x C <sup>bpw</sup> or C <sup>bpwo</sup><br>depending on treatment                                                    | Systolic BP x C <sup>bp**</sup>                                                 |
|  <b>Low risk Criteria</b> | <b>Sum</b><br>< 4                                                                      | <b>Sum</b><br>< 16<br>Negative 0 & 2h TnI                                             | <b>Sum</b><br>= 0                                                     | <b>Equation (recalibration)</b><br>< 89                        | <b>Equation (recalibration)</b><br>< 5%                                                                                               | <b>Equation (recalibration)</b><br>< 2.5% for ages < 70<br>< 7.5% for ages ≥ 70 |

**Supplemental Figure 2.** Required variables allocation and missing frequencies. A) Heat map of variables used for each risk score calculation. Required variables shown in blue. B) Frequency of missing values

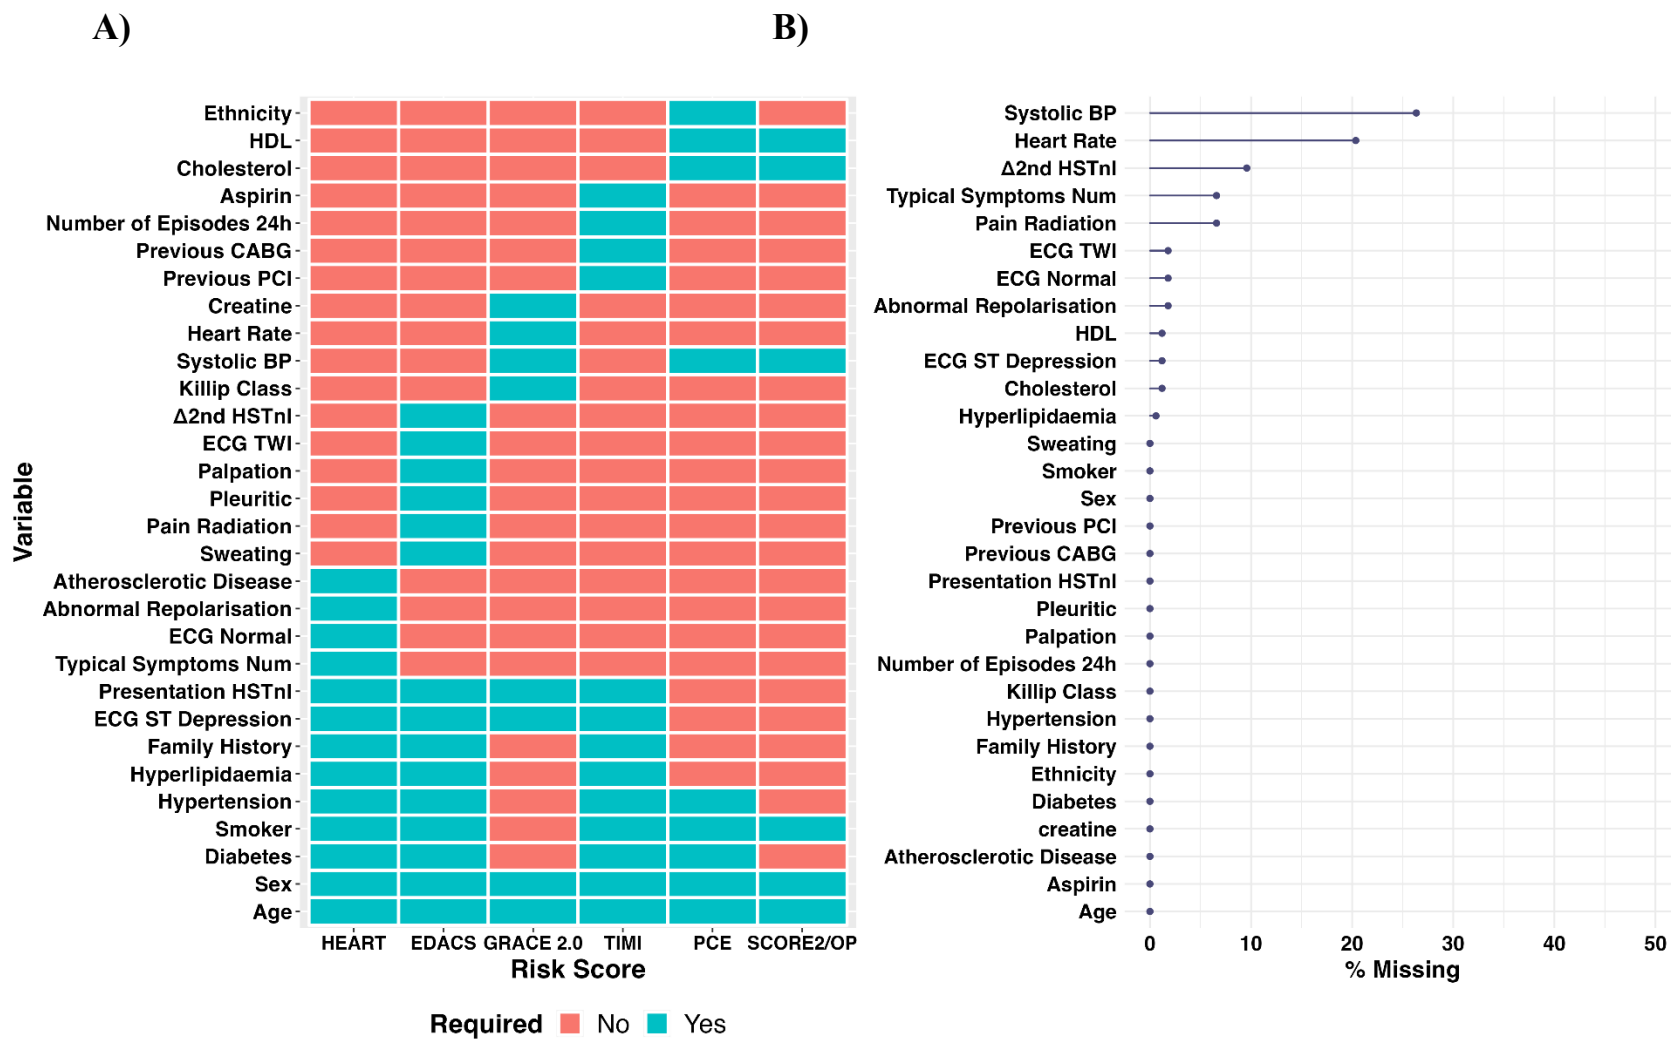

**Supplemental Figure 3. Comparison of AUC performances using DeLong's Test.** The heat map provides a visual representation of the statistical differences between the ROC curves for risk scores for A) any coronary artery disease and B) obstructive coronary artery disease. AUC = area under the curve.

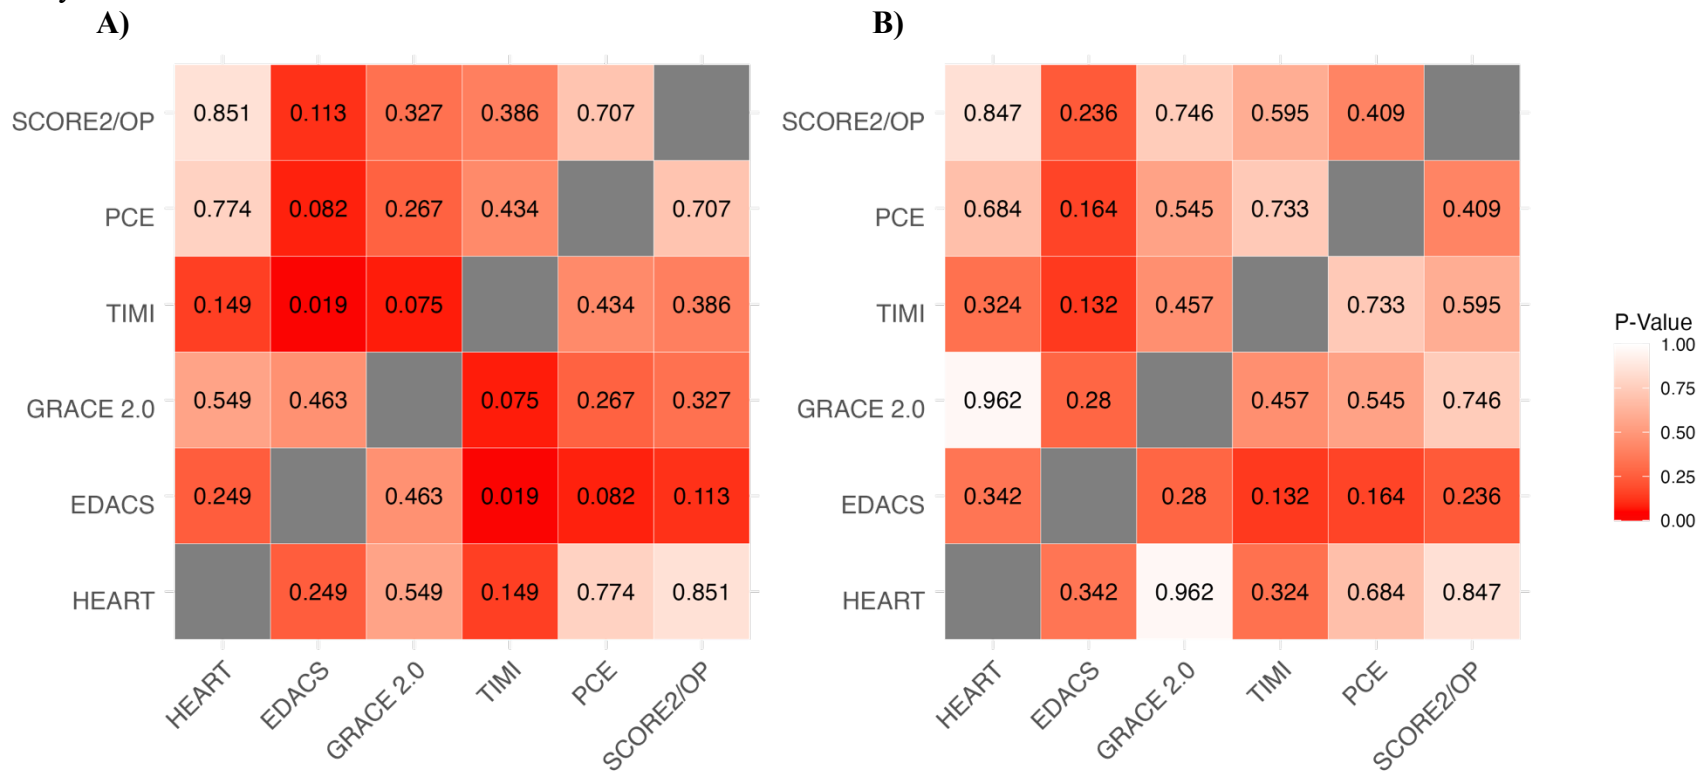

**Supplemental Figure 4. ROC analysis of risk scores for an adjudicated diagnosis of any coronary artery disease and obstructive coronary artery disease restricted to intermediate-risk patients without known previous coronary artery disease.** Receiver-operating-characteristic (ROC) curves illustrating discrimination of troponin and risk scores for A) any coronary artery disease and B) obstructive coronary artery disease. AUC = area under the curve.

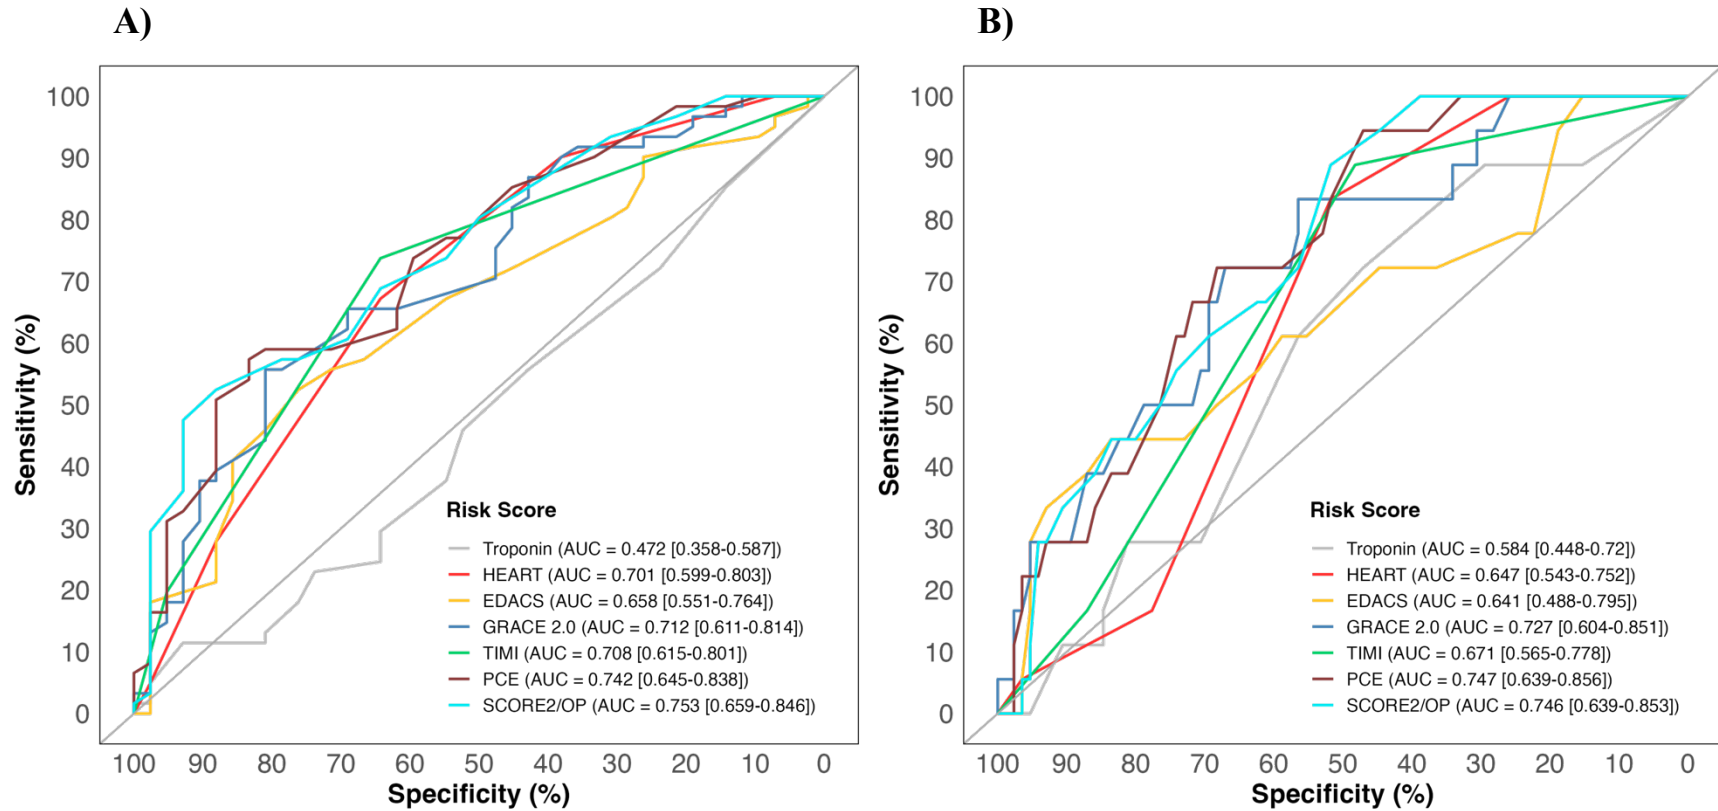

## References

1. Than, M., et al., *Development and validation of the Emergency Department Assessment of Chest pain Score and 2 h accelerated diagnostic protocol*. Emergency Medicine Australasia, 2014. **26**(1): p. 34-44.
2. Hageman, S., et al., *SCORE2 risk prediction algorithms: new models to estimate 10-year risk of cardiovascular disease in Europe*. European Heart Journal, 2021. **42**(25): p. 2439-2454.
3. Six, A.J., B.E. Backus, and J.C. Kelder, *Chest pain in the emergency room: value of the HEART score*. Neth Heart J, 2008. **16**(6): p. 191-6.
4. Karmali, K.N., et al., *A systematic examination of the 2013 ACC/AHA pooled cohort risk assessment tool for atherosclerotic cardiovascular disease*. J Am Coll Cardiol, 2014. **64**(10): p. 959-68.
5. Fox, K.A.A., et al., *Should patients with acute coronary disease be stratified for management according to their risk? Derivation, external validation and outcomes using the updated GRACE risk score*. Bmj Open, 2014. **4**(2).
6. de Vries, T.I., et al., *SCORE2-OP risk prediction algorithms: estimating incident cardiovascular event risk in older persons in four geographical risk regions*. European Heart Journal, 2021. **42**(25): p. 2455-2467.
7. Antman, E.M., et al., *The TIMI risk score for unstable angina/non-ST elevation MI: A method for prognostication and therapeutic decision making*. JAMA, 2000. **284**(7): p. 835-42.
8. Daniel Perez-Vicencio, D.D.a.A.J.T., *RiskScorescvd: Cardiovascular Risk Scores Calculator*. 2023.
9. Writing, C., et al., *2022 ACC Expert Consensus Decision Pathway on the Evaluation and Disposition of Acute Chest Pain in the Emergency Department: A Report of the American College of Cardiology Solution Set Oversight Committee*. J Am Coll Cardiol, 2022. **80**(20): p. 1925-1960.
10. Jakobsen, J.C., et al., *When and how should multiple imputation be used for handling missing data in randomised clinical trials - a practical guide with flowcharts*. BMC Medical Research Methodology, 2017. **17**.
